# Supplementary material
Source: HighWire-hosted journal article supplement (https://bmjopen.bmj.com/content/14/10/e078929)
Supplement: inline-supplementary-material-2 [file inline-supplementary-material-2.pdf]

Supplementary information

**Table 1:** characteristics of participants according to diabetes control as per fasting plasma glucose, stratified by survey, CoLaus|PsyColaus study, Lausanne, Switzerland.

|                        | First survey (2009-2012) |            |         | Second survey (2014-2017) |            |         | Third survey (2018-2021) |            |         |
|------------------------|--------------------------|------------|---------|---------------------------|------------|---------|--------------------------|------------|---------|
|                        | Not controlled           | Controlled | p-value | Not controlled            | Controlled | p-value | Not controlled           | Controlled | p-value |
| Sample size            | 121                      | 74         |         | 97                        | 102        |         | 79                       | 72         |         |
| Women (%)              | 37 (30.6)                | 22 (29.7)  | 1.000   | 28 (28.9)                 | 32 (31.4)  | 0.758   | 32 (40.5)                | 35 (48.6)  | 0.330   |
| Age (years)            | 65.1 ± 8.8               | 65.9 ± 8.4 | 0.519   | 66.6 ± 8.7                | 69.5 ± 8.8 | 0.020   | 68.8 ± 8.7               | 68.1 ± 8.7 | 0.652   |
| Swiss born (%)         | 85 (70.3)                | 43 (58.1)  | 0.090   | 59 (60.8)                 | 67 (65.7)  | 0.556   | 55 (69.6)                | 42 (58.3)  | 0.175   |
| Education (%)          |                          |            | 0.212   |                           |            | 0.589   |                          |            | 1.000   |
| High                   | 11 (9.1)                 | 13 (17.6)  |         | 12 (12.4)                 | 12 (11.9)  |         | 9 (11.4)                 | 8 (11.1)   |         |
| Middle                 | 29 (24.0)                | 18 (24.3)  |         | 24 (24.7)                 | 19 (18.8)  |         | 18 (22.8)                | 17 (23.6)  |         |
| Low                    | 81 (66.9)                | 43 (58.1)  |         | 61 (62.9)                 | 70 (69.3)  |         | 52 (65.8)                | 47 (65.3)  |         |
| BMI (kg/m²)            | 30.5 ± 5.6               | 29.4 ± 4.1 | 0.161   | 30.5 ± 4.9                | 30.6 ± 5.1 | 0.924   | 29.8 ± 4.6               | 29.0 ± 5.6 | 0.378   |
| BMI categories (%)     |                          |            | 0.711   |                           |            | 1.000   |                          |            | 0.319   |
| Normal                 | 17 (14.1)                | 10 (13.5)  |         | 11 (11.5)                 | 12 (11.8)  |         | 11 (13.9)                | 15 (20.8)  |         |
| Overweight             | 50 (41.3)                | 35 (47.3)  |         | 37 (38.5)                 | 39 (38.2)  |         | 33 (41.8)                | 33 (45.8)  |         |
| Obese                  | 54 (44.6)                | 29 (39.2)  |         | 48 (50.0)                 | 51 (50.0)  |         | 35 (44.3)                | 24 (33.3)  |         |
| Smoking categories (%) |                          |            | 0.770   |                           |            | 0.022   |                          |            | 0.950   |
| Never                  | 37 (30.6)                | 25 (33.8)  |         | 26 (26.8)                 | 39 (38.2)  |         | 29 (36.7)                | 28 (38.9)  |         |
| Former                 | 65 (53.7)                | 40 (54.1)  |         | 57 (58.8)                 | 40 (39.2)  |         | 38 (48.1)                | 34 (47.2)  |         |
| Current                | 19 (15.7)                | 9 (12.2)   |         | 14 (14.4)                 | 23 (22.6)  |         | 12 (15.2)                | 10 (13.9)  |         |
| Hypertension (%)       | 99 (81.8)                | 55 (74.3)  | 0.277   | 76 (78.4)                 | 80 (78.4)  | 1.000   | 67 (84.8)                | 57 (79.2)  | 0.401   |
| Hypolipidemic ttt (%)  | 67 (55.4)                | 51 (68.9)  | 0.071   |                           |            |         |                          |            |         |
| History of CVD (%)     | 18 (14.9)                | 12 (16.2)  | 0.839   | 18 (18.6)                 | 20 (19.6)  | 0.859   | 16 (20.3)                | 13 (18.1)  | 0.837   |

BMI, body mass index; CVD, cardiovascular disease; ttt, treatment. Results expressed as mean ± standard deviation for continuous variables or as number of participants (percentage) for categorical variables. Statistical analysis by student’s t-test or chi-square test.

**Supplementary table 2:** bivariate analysis, self-reported physical activity by diabetes control group as defined by fasting plasma glucose, stratified by survey, CoLaus|PsyCoLaus study, Lausanne, Switzerland.

|                                    | First survey (2009-2012) |                    |         | Second survey (2014-2017) |                    |         |
|------------------------------------|--------------------------|--------------------|---------|---------------------------|--------------------|---------|
|                                    | Not controlled           | Controlled         | p-value | Not controlled            | Controlled         | p-value |
| Sample size                        | 121                      | 74                 |         | 52                        | 48                 |         |
| Intensity of PA (min/day)          |                          |                    |         |                           |                    |         |
| Sedentary                          | 522 [394 - 660]          | 557 [449 - 651]    | 0.379   | 555 [405 - 665]           | 532 [469 - 648]    | 0.637   |
| Light                              | 185 [107 - 272]          | 156 [109 - 243]    | 0.128   | 168 [125 - 249]           | 157 [123 - 242]    | 0.567   |
| Moderate                           | 164 [95 - 249]           | 155 [107 - 265]    | 0.862   | 143 [105 - 246]           | 161 [104 - 221]    | 0.992   |
| Vigorous                           | 0.7 [0 - 4]              | 0.8 [0 - 4.5]      | 0.995   | 18 [0 - 46]               | 15 [0 - 55]        | 0.997   |
| At least 150 minutes MVPA per week | 118 (97.5)               | 73 (98.7)          | \$      | 51 (78.5)                 | 45 (76.3)          | 0.270   |
| Intensity of PA (% of daily time)  |                          |                    |         |                           |                    |         |
| Sedentary                          | 57.2 [42.4 - 68.8]       | 59.4 [46.8 - 68.4] | 0.418   | 60.1 [44.6 - 68.0]        | 58.0 [48.3 - 68.0] | 0.551   |
| Light                              | 19.3 [11.2 - 29.7]       | 16.6 [12.0 - 24.5] | 0.108   | 18.5 [13.8 - 26.7]        | 17.7 [12.8 - 26.6] | 0.801   |
| Moderate                           | 17.2 [10.7 - 25.8]       | 16.2 [11.2 - 26.9] | 0.823   | 15.0 [10.3 - 26.8]        | 16.7 [11.4 - 24.2] | 0.866   |
| Vigorous                           | 6.0 [0 - 37.0]           | 6.0 [0 - 39.0]     | 0.980   | 1.9 [0 - 5.2]             | 1.4 [0 - 6.0]      | 0.963   |

PA, physical activity; MVPA, moderate and vigorous physical activity. Results expressed as median [interquartile range] for continuous variables and as number of participants (column percentage) for categorical variables. Statistical analysis by Kruskal-Wallis test for continuous variables and chi-square or Fisher’s exact test (\$) for categorical variables.

**Supplementary table 3:** bivariate analysis, objectively assessed physical activity by diabetes control group as defined by fasting plasma glucose, stratified by survey, CoLaus|PsyCoLaus study, Lausanne, Switzerland.

|                                        | Second survey (2014-2017) |                    |         | Third survey (2018-2021) |                    |         |
|----------------------------------------|---------------------------|--------------------|---------|--------------------------|--------------------|---------|
|                                        | Not controlled            | Controlled         | p-value | Not controlled           | Controlled         | p-value |
| Sample size                            | 97                        | 102                |         | 79                       | 72                 |         |
| Intensity of PA (min/day)              |                           |                    |         |                          |                    |         |
| Sedentary                              | 624 [522 - 691]           | 640 [561 - 734]    | 0.061   | 625 [515 - 693]          | 588 [503 - 690]    | 0.341   |
| Light                                  | 92 [69 - 124]             | 83 [58 - 111]      | 0.024   | 87 [65 - 115]            | 83 [68 - 102]      | 0.378   |
| Moderate                               | 108 [65 - 165]            | 91 [54 - 134]      | 0.057   | 117 [56 - 161]           | 111 [60 - 160]     | 0.780   |
| Vigorous                               | 0 [0 - 1]                 | 0 [0 - 1]          | 0.021   | 0 [0 - 2]                | 0 [0 - 2]          | 0.683   |
| At least 150 minutes MVPA per week (%) | 93 (95.9)                 | 94 (92.2)          | 0.271   | 71 (89.9)                | 67 (93.1)          | 0.486   |
| Intensity of PA (% of daily time)      |                           |                    |         |                          |                    |         |
| Sedentary                              | 74.7 [67.0 - 82.6]        | 79.2 [72.1 - 85.1] | 0.011   | 75.7 [68.1 - 84.9]       | 74.5 [66.7 - 82.3] | 0.587   |
| Light                                  | 11.1 [9.1 - 14.1]         | 9.8 [7.5 - 13.0]   | 0.008   | 11 [8.0 - 13.1]          | 10.7 [8.4 - 12.9]  | 0.631   |
| Moderate                               | 12.5 [8.3 - 20.0]         | 10.3 [7.3 - 16.4]  | 0.039   | 14.1 [6.9 - 18.9]        | 14.0 [8.4 - 18.9]  | 0.479   |
| Vigorous                               | 0.1 [0 - 0.2]             | 0 [0 - 0.1]        | 0.021   | 0 [0 - 0.2]              | 0 [0 - 0.2]        | 0.582   |

PA, physical activity; MVPA, moderate and vigorous physical activity. Results expressed as median [interquartile range] for continuous variables and as number of participants (column percentage) for categorical variables. Statistical analysis by Kruskal-Wallis test for continuous variables and chi-square or Fisher’s exact test (\$) for categorical variables. Physical activity data assessed using the GENEActiv macro file ‘General physical activity’ version 1.9.

**Supplementary table 4:** bivariate analysis, objectively assessed physical activity by diabetes control group as defined by fasting plasma glucose, stratified by survey, CoLaus|PsyCoLaus study, Lausanne, Switzerland.

|                                    | Second survey (2014-2017) |                    |         | Third survey (2018-2021) |                    |         |
|------------------------------------|---------------------------|--------------------|---------|--------------------------|--------------------|---------|
|                                    | Not controlled            | Controlled         | p-value | Not controlled           | Controlled         | p-value |
| Sample size                        | 95                        | 100                |         | 31                       | 27                 |         |
| Intensity of PA (min/day)          |                           |                    |         |                          |                    |         |
| Sedentary                          | 750 [708 - 811]           | 770 [722 - 822]    | 0.123   | 768 [725 - 809]          | 742 [706 - 821]    | 0.591   |
| Light                              | 72 [43 - 107]             | 60 [35 - 89]       | 0.076   | 81 [43 - 106]            | 66 [40 - 105]      | 0.198   |
| Moderate                           | 11 [6 - 22]               | 9 [3 - 16]         | 0.039   | 13 [6 - 22]              | 9 [6 - 19]         | 0.239   |
| Vigorous                           | 1 [0 - 1]                 | 0 [0 - 1]          | 0.041   | 1 [0 - 2]                | 0 [0 - 1]          | 0.080   |
| At least 150 minutes MVPA per week | 19 (20.0)                 | 13 (13.0)          | 0.187   | 8 (25.8)                 | 6 (22.2)           | 0.750   |
| Intensity of PA (% of daily time)  |                           |                    |         |                          |                    |         |
| Sedentary                          | 90.2 [85 - 94.1]          | 92.1 [87.8 - 95.1] | 0.057   | 89.1 [85.5 - 94.0]       | 91.6 [86.6 - 95.0] | 0.233   |
| Light                              | 8.2 [5.3 - 12.2]          | 6.8 [4.3 - 10.5]   | 0.062   | 9.1 [5.4 - 12.3]         | 7.3 [4.4 - 11.1]   | 0.252   |
| Moderate                           | 1.3 [0.7 - 2.4]           | 1.1 [0.4 - 1.8]    | 0.032   | 1.6 [0.7 - 2.4]          | 1.0 [0.7 - 2.2]    | 0.239   |
| Vigorous                           | 0.1 [0 - 0.2]             | 0 [0 - 0.1]        | 0.033   | 0.1 [0 - 0.2]            | 0 [0 - 0.1]        | 0.072   |

PA, physical activity; MVPA, moderate and vigorous physical activity. Results expressed as median [interquartile range] for continuous variables and as number of participants (column percentage) for categorical variables. Statistical analysis by Kruskal-Wallis test for continuous variables and chi-square for categorical variables. Physical activity data assessed using the R-package GGIR version 1.5–9.

**Supplementary table 5:** multivariable analysis, objectively assessed physical activity by control group as defined by fasting plasma glucose, stratified by survey, CoLaus|PsyCoLaus study, Lausanne, Switzerland.

|                                    | Second survey (2014-2017) |                    |         | Third survey (2018-2021) |                    |         |
|------------------------------------|---------------------------|--------------------|---------|--------------------------|--------------------|---------|
|                                    | Not controlled            | Controlled         | p-value | Not controlled           | Controlled         | p-value |
| Sample size                        | 95                        | 100                |         | 31                       | 27                 |         |
| Intensity of PA (min/day)          |                           |                    |         |                          |                    |         |
| Sedentary                          | 761 ± 7                   | 769 ± 7            | 0.403   | 756 ± 14                 | 770 ± 15           | 0.527   |
| Light                              | 78 ± 4                    | 69 ± 4             | 0.184   | 85 ± 9                   | 71 ± 9             | 0.317   |
| Moderate                           | 15 ± 1                    | 13 ± 1             | 0.509   | 18 ± 3                   | 15 ± 3             | 0.528   |
| Vigorous                           | 1 ± 1                     | 1 ± 1              | 0.394   | 1 ± 1                    | 1 ± 1              | 0.370   |
| At least 150 minutes MVPA per week | 1 (ref)                   | 0.85 (0.34 - 2.14) | 0.727   | 1 (ref)                  | 0.39 (0.07 - 2.07) | 0.268   |
| Intensity of PA (% of daily time)  |                           |                    |         |                          |                    |         |
| Sedentary                          | 89.3 ± 0.6                | 90.4 ± 0.6         | 0.212   | 88.2 ± 1.3               | 90.0 ± 1.3         | 0.353   |
| Light                              | 8.9 ± 0.5                 | 8.0 ± 0.5          | 0.177   | 9.6 ± 0.9                | 8.2 ± 1.0          | 0.316   |
| Moderate                           | 1.7 ± 0.1                 | 1.5 ± 0.1          | 0.501   | 2.0 ± 0.3                | 1.7 ± 0.4          | 0.581   |
| Vigorous                           | 0.2 ± 0.1                 | 0.1 ± 0.1          | 0.432   | 0.2 ± 0.1                | 0.1 ± 0.1          | 0.395   |

PA, physical activity; MVPA, moderate and vigorous physical activity. Results are expressed as mean ± sem for continuous variables and as odds ratio and (95% confidence interval) for categorical variables. Statistical analysis by analysis of variance for continuous variables and by logistic regression for categorical variables, adjusted for sex (male, female), age (continuous), BMI categories (normal, overweight, obese), smoking status (never, former, current), educational level (low, medium, high). Physical activity data assessed using the R-package GGIR version 1.5–9.

**Table 1:** multivariable analysis, self-reported physical activity by control group, stratified by survey, CoLaus|PsyCoLaus study, Lausanne, Switzerland.

|                                    | First survey (2009-2012) |            |         | Second survey (2014-2017) |                    |         |
|------------------------------------|--------------------------|------------|---------|---------------------------|--------------------|---------|
|                                    | Not controlled           | Controlled | p-value | Not controlled            | Controlled         | p-value |
| Sample size                        | 121                      | 74         |         | 52                        | 48                 |         |
| Intensity of PA (min/day)          |                          |            |         |                           |                    |         |
| Sedentary                          | 527 ± 15                 | 542 ± 19   | 0.543   | 525 ± 25                  | 556 ± 26           | 0.395   |
| Light                              | 197 ± 10                 | 166 ± 13   | 0.056   | 204 ± 16                  | 176 ± 16           | 0.237   |
| Moderate                           | 186 ± 11                 | 191 ± 15   | 0.819   | 181 ± 17                  | 185 ± 18           | 0.864   |
| Vigorous                           | 32 ± 8                   | 46 ± 10    | 0.250   | 43 ± 10                   | 26 ± 11            | 0.262   |
| At least 150 minutes MVPA per week | 1 (ref)                  | NC         |         | 1 (ref)                   | 0.85 (0.35 - 2.09) | 0.731 § |
| Intensity of PA (% of daily time)  |                          |            |         |                           |                    |         |
| Sedentary                          | 56 ± 1.5                 | 57.3 ± 2   | 0.608   | 54.8 ± 2.4                | 58.8 ± 2.5         | 0.257   |
| Light                              | 20.9 ± 1                 | 17.7 ± 1.3 | 0.057   | 21.4 ± 1.6                | 18.8 ± 1.7         | 0.275   |
| Moderate                           | 19.7 ± 1.2               | 20.2 ± 1.5 | 0.798   | 19.3 ± 1.9                | 19.6 ± 1.9         | 0.291   |
| Vigorous                           | 3.4 ± 0.8                | 4.8 ± 1    | 0.260   | 4.6 ± 1                   | 2.8 ± 1.1          | 0.257   |

PA, physical activity; MVPA, moderate and vigorous physical activity Results are expressed as standardized beta coefficients. Statistical analysis by linear regression adjusted for sex (male, female), age (continuous), BMI categories (normal, overweight, obese), smoking status (never, former, current), educational level (low, medium, high).

**Supplementary table 6:** multivariable analysis, association between self-reported physical activity and fasting plasma glucose, stratified by survey, CoLaus|PsyCoLaus study, Lausanne, Switzerland.

|                                   | First survey (2009-2012) | p-value | Second survey (2014-2017) | p-value |
|-----------------------------------|--------------------------|---------|---------------------------|---------|
| Sample size                       | 195                      |         | 100                       |         |
| Intensity of PA (min/day)         |                          |         |                           |         |
| Sedentary                         | 0.040                    | 0.599   | -0.080                    | 0.455   |
| Light                             | 0.068                    | 0.378   | 0.074                     | 0.493   |
| Moderate                          | 0.003                    | 0.968   | 0.070                     | 0.517   |
| Vigorous                          | -0.139                   | 0.059   | 0.051                     | 0.635   |
| Intensity of PA (% of daily time) |                          |         |                           |         |
| Sedentary                         | 0.028                    | 0.716   | -0.120                    | 0.271   |
| Light                             | 0.066                    | 0.388   | 0.055                     | 0.613   |
| Moderate                          | 0.003                    | 0.972   | 0.083                     | 0.439   |
| Vigorous                          | -0.141                   | 0.055   | 0.041                     | 0.700   |

PA, physical activity; MVPA, moderate and vigorous physical activity. Results are expressed as standardized beta coefficients. Statistical analysis by linear regression adjusted for sex (male, female), age (continuous), BMI categories (normal, overweight, obese), smoking status (never, former, current), educational level (low, medium, high).

**Supplementary table 7:** multivariable analysis, association between objectively assessed physical activity and fasting plasma glucose, stratified by survey, CoLaus|PsyCoLaus study, Lausanne, Switzerland.

|                                   | Second survey (2014-2017) | p-value | Third survey (2018-2021) | p-value |
|-----------------------------------|---------------------------|---------|--------------------------|---------|
| Sample size                       | 199                       |         | 151                      |         |
| Intensity of PA (min/day)         |                           |         |                          |         |
| Sedentary                         | -0.072                    | 0.340   | 0.081                    | 0.360   |
| Light                             | 0.203                     | 0.005   | 0.126                    | 0.152   |
| Moderate                          | 0.140                     | 0.069   | -0.051                   | 0.589   |
| Vigorous                          | 0.012                     | 0.871   | -0.019                   | 0.831   |
| Intensity of PA (% of daily time) |                           |         |                          |         |
| Sedentary                         | -0.145                    | 0.061   | 0.021                    | 0.827   |
| Light                             | 0.187                     | 0.011   | 0.104                    | 0.242   |
| Moderate                          | 0.103                     | 0.188   | -0.072                   | 0.449   |
| Vigorous                          | -0.007                    | 0.928   | -0.029                   | 0.742   |

PA, physical activity; MVPA, moderate and vigorous physical activity. Results are expressed as standardized beta coefficients. Statistical analysis by linear regression adjusted for sex (male, female), age (continuous), BMI categories (normal, overweight, obese), smoking status (never, former, current), educational level (low, medium, high). Physical activity data assessed using the GENEActiv macro file ‘General physical activity’ version 1.9.



**Supplementary table 8:** multivariable analysis, association between objectively assessed physical activity and fasting plasma glucose, stratified by survey, CoLaus|PsyCoLaus study, Lausanne, Switzerland.

|                                   | Second survey (2014-2017) | p-value | Third survey (2018-2021) | p-value |
|-----------------------------------|---------------------------|---------|--------------------------|---------|
| Sample size                       | 195                       |         | 58                       |         |
| Intensity of PA (min/day)         |                           |         |                          |         |
| Sedentary                         | -0.071                    | 0.352   | 0.121                    | 0.433   |
| Light                             | 0.154                     | 0.052   | -0.105                   | 0.532   |
| Moderate                          | 0.078                     | 0.339   | -0.099                   | 0.562   |
| Vigorous                          | 0.021                     | 0.782   | 0.055                    | 0.726   |
| Intensity of PA (% of daily time) |                           |         |                          |         |
| Sedentary                         | -0.141                    | 0.080   | 0.256                    | 0.102   |
| Light                             | 0.154                     | 0.053   | -0.101                   | 0.547   |
| Moderate                          | 0.074                     | 0.372   | -0.100                   | 0.557   |
| Vigorous                          | 0.012                     | 0.880   | 0.067                    | 0.670   |

PA, physical activity; MVPA, moderate and vigorous physical activity. Results are expressed as standardized beta coefficients. Statistical analysis by linear regression adjusted for sex (male, female), age (continuous), BMI categories (normal, overweight, obese), smoking status (never, former, current), educational level (low, medium, high). Physical activity data assessed using the R-package GGIR version 1.5–9.

**Supplementary table 9:** bivariate analysis, objectively assessed physical activity by diabetes control group as defined by glycated haemoglobin, stratified by survey, CoLaus|PsyCoLaus study, Lausanne, Switzerland.

|                                        | Second survey (2014-2017) |                    |         | Third survey (2018-2021) |                    |         |
|----------------------------------------|---------------------------|--------------------|---------|--------------------------|--------------------|---------|
|                                        | Not controlled            | Controlled         | p-value | Not controlled           | Controlled         | p-value |
| Sample size                            | 123                       | 76                 |         | 95                       | 56                 |         |
| Intensity of PA (min/day)              |                           |                    |         |                          |                    |         |
| Sedentary                              | 626 [532 - 697]           | 638 [569 - 731]    | 0.151   | 600 [509 - 697]          | 603 [520 - 687]    | 0.742   |
| Light                                  | 89 [65 - 121]             | 81 [59 - 110]      | 0.113   | 90 [63 - 112]            | 82 [70 - 100]      | 0.455   |
| Moderate                               | 106 [62 - 162]            | 89 [54 - 134]      | 0.140   | 123 [63 - 166]           | 102 [53 - 151]     | 0.552   |
| Vigorous                               | 0 [0 - 1]                 | 0 [0 - 1]          | 0.139   | 0 [0 - 2]                | 0 [0 - 2]          | 0.843   |
| At least 150 minutes MVPA per week (%) | 116 (94.3)                | 71 (93.4)          | 0.798   | 87 (91.6)                | 51 (91.1)          | 0.914   |
| Intensity of PA (% of daily time)      |                           |                    |         |                          |                    |         |
| Sedentary                              | 75.0 [68.2 - 83.1]        | 79.0 [72.0 - 85.2] | 0.082   | 73.9 [66.3 - 83.9]       | 75.5 [68.4 - 82.3] | 0.726   |
| Light                                  | 11.0 [8.9 - 13.7]         | 9.9 [7.1 - 13.2]   | 0.074   | 11.2 [8.0 - 13.2]        | 10.1 [8.5 - 12.6]  | 0.520   |
| Moderate                               | 12.5 [7.9 - 19.6]         | 10.3 [7.2 - 16.7]  | 0.106   | 14.6 [7.6 - 19.4]        | 12.3 [7.6 - 17.7]  | 0.540   |
| Vigorous                               | 0 [0 - 0.2]               | 0 [0 - 0.1]        | 0.144   | 0 [0 - 0.2]              | 0 [0 - 0.2]        | 0.777   |

PA, physical activity; MVPA, moderate and vigorous physical activity. Results expressed as median [interquartile range] for continuous variables and as number of participants (column percentage) for categorical variables. Statistical analysis by Kruskal-Wallis test for continuous variables and chi-square for categorical variables. Physical activity data assessed using the GENEActiv macro file ‘General physical activity’ version 1.9.

**Supplementary table 10:** bivariate analysis, objectively assessed physical activity by diabetes control group as defined by glycated haemoglobin, stratified by survey, CoLaus|PsyCoLaus study, Lausanne, Switzerland.

|                                        | Second survey (2014-2017) |                    |         | Third survey (2018-2021) |                    |         |
|----------------------------------------|---------------------------|--------------------|---------|--------------------------|--------------------|---------|
|                                        | Not controlled            | Controlled         | p-value | Not controlled           | Controlled         | p-value |
| Sample size                            | 119                       | 76                 |         | 38                       | 20                 |         |
| Intensity of PA (min/day)              |                           |                    |         |                          |                    |         |
| Sedentary                              | 752 [719 - 812]           | 770 [722 - 827]    | 0.210   | 764 [727 - 808]          | 742 [706 - 819]    | 0.612   |
| Light                                  | 69 [40 - 105]             | 60 [35 - 85]       | 0.146   | 77 [41 - 106]            | 68 [45 - 97]       | 0.935   |
| Moderate                               | 10 [5 - 19]               | 9 [4 - 17]         | 0.344   | 13 [6 - 22]              | 10 [7 - 17]        | 0.731   |
| Vigorous                               | 1 [0 - 1]                 | 0 [0 - 1]          | 0.317   | 1 [0 - 2]                | 0 [0 - 1]          | 0.185   |
| At least 150 minutes MVPA per week (%) | 20 (16.8)                 | 12 (15.8)          | 0.852   | 10 (26.3)                | 4 (20.0)           | 0.593   |
| Intensity of PA (% of daily time)      |                           |                    |         |                          |                    |         |
| Sedentary                              | 90.4 [85.5 - 94.3]        | 92.1 [87.6 - 95.1] | 0.172   | 89.6 [85.5 - 94.1]       | 91.3 [87.1 - 93.5] | 0.806   |
| Light                                  | 7.9 [5.1 - 12.1]          | 6.9 [4.3 - 10.1]   | 0.116   | 8.6 [5.0 - 12.3]         | 7.6 [5.4 - 11.0]   | 0.909   |
| Moderate                               | 1.2 [0.6 - 2.2]           | 1.1 [0.4 - 2.0]    | 0.324   | 1.5 [0.7 - 2.4]          | 1.1 [0.8 - 2.0]    | 0.659   |
| Vigorous                               | 0.1 [0 - 0.2]             | 0 [0 - 0.2]        | 0.113   | 0.1 [0 - 0.2]            | 0.1 [0 - 0.1]      | 0.191   |

PA, physical activity; MVPA, moderate and vigorous physical activity. Results expressed as median [interquartile range] for continuous variables and as number of participants (column percentage) for categorical variables. Statistical analysis by Kruskal-Wallis test for continuous variables and chi-square for categorical variables. Physical activity data assessed using the R-package GGIR version 1.5–9.

**Supplementary table 11:** multivariable analysis, objectively assessed physical activity by control group as defined by glycated haemoglobin, stratified by survey, CoLaus|PsyCoLaus study, Lausanne, Switzerland.

|                                    | Second survey (2014-2017) |                    |         | Third survey (2018-2021) |                    |         |
|------------------------------------|---------------------------|--------------------|---------|--------------------------|--------------------|---------|
|                                    | Not controlled            | Controlled         | p-value | Not controlled           | Controlled         | p-value |
| Sample size                        | 119                       | 76                 |         | 38                       | 20                 |         |
| Intensity of PA (min/day)          |                           |                    |         |                          |                    |         |
| Sedentary                          | 761 ± 6                   | 770 ± 8            | 0.353   | 766 ± 12                 | 756 ± 17           | 0.664   |
| Light                              | 76 ± 4                    | 68 ± 5             | 0.221   | 76 ± 8                   | 84 ± 11            | 0.570   |
| Moderate                           | 13 ± 1                    | 15 ± 1             | 0.494   | 16 ± 3                   | 18 ± 4             | 0.614   |
| Vigorous                           | 1 ± 1                     | 1 ± 1              | 0.974   | 1 ± 1                    | 1 ± 1              | 0.238   |
| At least 150 minutes MVPA per week | 1 (ref)                   | 1.31 (0.53 - 3.28) | 0.560   | 1 (ref)                  | 0.62 (0.11 - 3.42) | 0.586   |
| Intensity of PA (% of daily time)  |                           |                    |         |                          |                    |         |
| Sedentary                          | 89.5 ± 0.5                | 90.3 ± 0.7         | 0.392   | 89.4 ± 1.1               | 88.3 ± 1.6         | 0.571   |
| Light                              | 8.8 ± 0.4                 | 7.9 ± 0.5          | 0.199   | 8.6 ± 0.8                | 9.5 ± 1.2          | 0.554   |
| Moderate                           | 1.5 ± 0.1                 | 1.7 ± 0.2          | 0.484   | 1.8 ± 0.3                | 2.1 ± 0.4          | 0.580   |
| Vigorous                           | 0.1 ± 0.1                 | 0.1 ± 0.1          | 0.982   | 0.2 ± 0.1                | 0.1 ± 0.1          | 0.228   |

PA, physical activity; MVPA, moderate and vigorous physical activity. Results are expressed as mean ± sem for continuous variables and as odds ratio and (95% confidence interval) for categorical variables. Statistical analysis by analysis of variance for continuous variables and by logistic regression for categorical variables, adjusted for sex (male, female), age (continuous), BMI categories (normal, overweight, obese), smoking status (never, former, current), educational level (low, medium, high). Physical activity data assessed using the R-package GGIR version 1.5–9.

**Supplementary table 12:** multivariable analysis, association between objectively assessed physical activity and glycated haemoglobin, stratified by survey, CoLaus|PsyCoLaus study, Lausanne, Switzerland.

|                                   | Second survey (2014-2017) | p-value | Third survey (2018-2021) | p-value |
|-----------------------------------|---------------------------|---------|--------------------------|---------|
| Sample size                       | 199                       |         | 151                      |         |
| Intensity of PA (min/day)         |                           |         |                          |         |
| Sedentary                         | -0.072                    | 0.340   | 0.081                    | 0.360   |
| Light                             | 0.203                     | 0.005   | 0.126                    | 0.152   |
| Moderate                          | 0.140                     | 0.069   | -0.051                   | 0.589   |
| Vigorous                          | 0.012                     | 0.871   | -0.019                   | 0.831   |
| Intensity of PA (% of daily time) |                           |         |                          |         |
| Sedentary                         | -0.145                    | 0.061   | 0.021                    | 0.827   |
| Light                             | 0.187                     | 0.011   | 0.104                    | 0.242   |
| Moderate                          | 0.103                     | 0.188   | -0.072                   | 0.449   |
| Vigorous                          | -0.007                    | 0.928   | -0.029                   | 0.742   |

PA, physical activity; MVPA, moderate and vigorous physical activity. Results are expressed as standardized beta coefficients. Statistical analysis by linear regression adjusted for sex (male, female), age (continuous), BMI categories (normal, overweight, obese), smoking status (never, former, current), educational level (low, medium, high). Physical activity data assessed using the GENEActiv macro file ‘General physical activity’ version 1.9.

**Supplementary table 13:** multivariable analysis, association between objectively assessed physical activity and glycated haemoglobin, stratified by survey, CoLaus|PsyCoLaus study, Lausanne, Switzerland.

|                                   | Second survey (2014-2017) | p-value | Third survey (2018-2021) | p-value |
|-----------------------------------|---------------------------|---------|--------------------------|---------|
| Sample size                       | 195                       |         | 58                       |         |
| Intensity of PA (min/day)         |                           |         |                          |         |
| Sedentary                         | -0.071                    | 0.352   | 0.121                    | 0.433   |
| Light                             | 0.154                     | 0.052   | -0.105                   | 0.532   |
| Moderate                          | 0.078                     | 0.339   | -0.099                   | 0.562   |
| Vigorous                          | 0.021                     | 0.782   | 0.055                    | 0.726   |
| Intensity of PA (% of daily time) |                           |         |                          |         |
| Sedentary                         | -0.141                    | 0.080   | 0.256                    | 0.102   |
| Light                             | 0.154                     | 0.053   | -0.101                   | 0.547   |
| Moderate                          | 0.074                     | 0.372   | -0.100                   | 0.557   |
| Vigorous                          | 0.012                     | 0.880   | 0.067                    | 0.670   |

PA, physical activity; MVPA, moderate and vigorous physical activity. Results are expressed as standardized beta coefficients. Statistical analysis by linear regression adjusted for sex (male, female), age (continuous), BMI categories (normal, overweight, obese), smoking status (never, former, current), educational level (low, medium, high). Physical activity data assessed using the R-package GGIR version 1.5–9.
